# Supplementary material
Source: MDPI journal article supplement (https://www.mdpi.com/2072-4292/14/19/4921)
Supplement: s1 [file s1]

| Article                 | Place                                             | Water body surface (Km <sup>2</sup> ) | Satellite                  | Studied period         | Image number | Atmospheric correction | Classification                                                       | Cover (ha or %)               | Seasonal coverage (the highest cover)    | Index                                                                                                         | range NDVI    | Seasonal variability of NDVI (highest NDVI) | Water quality parameters                                                                   |
|-------------------------|---------------------------------------------------|---------------------------------------|----------------------------|------------------------|--------------|------------------------|----------------------------------------------------------------------|-------------------------------|------------------------------------------|---------------------------------------------------------------------------------------------------------------|---------------|---------------------------------------------|--------------------------------------------------------------------------------------------|
| Shekede 2008            | Lake Chivero, Zimbabwe, South Africa              | 26.32                                 | Landsat-2                  | 1976                   | 1            | Level 1 TOA            | -                                                                    | 967                           | -                                        | NDVI                                                                                                          | 0-0.86 (0.35) | -                                           | -                                                                                          |
|                         |                                                   |                                       | Landsat-5                  | 1989                   | 1            |                        |                                                                      | 863                           |                                          |                                                                                                               | 0-0.82 (0.51) |                                             |                                                                                            |
|                         |                                                   |                                       |                            | 2000                   | 1            |                        |                                                                      | 806                           |                                          |                                                                                                               | 0-0.61 (0.3)  |                                             |                                                                                            |
| Cavalli et al 2009      | Winam Gulf, Lake Victoria, Kenya, Oriental Africa | 1400                                  | Landsat 7 ETM+             | 1999, 2001             | 2            | Level 2 BOA (6S)       | Minimum Distance algorithm and spectral unmixing                     | 500 - 3000                    | May > Aug > Jul, 2005; Jan>Jun>Dec, 2006 | -                                                                                                             | -             | -                                           | Field sampling and Remote sensed data (Chl-a, CDOM and TSS)                                |
|                         |                                                   |                                       | ASTER                      | 2002 - 2006            | 4            | N/A                    |                                                                      |                               |                                          |                                                                                                               |               |                                             |                                                                                            |
|                         |                                                   |                                       | MERIS (WQ data)            | 2001                   | 1            | Level 2 BOA            |                                                                      |                               |                                          |                                                                                                               |               |                                             |                                                                                            |
| Kiage et al 2011        | Winam Gulf, Lake Victoria, Kenya, Oriental Africa | 1400                                  | MODIS                      | 2001-2005              | 11           | Level-1B BOA           | -                                                                    | 5000-12000                    | -                                        | NDVI                                                                                                          | >0.1          | -                                           | -                                                                                          |
|                         |                                                   |                                       |                            | 2006-2007              |              |                        |                                                                      | 25000-35000                   |                                          |                                                                                                               |               |                                             |                                                                                            |
|                         |                                                   |                                       |                            | 2008-2009              |              |                        |                                                                      | 15000-20000                   |                                          |                                                                                                               |               |                                             |                                                                                            |
|                         |                                                   |                                       |                            | 2010                   |              |                        |                                                                      | 35306                         |                                          |                                                                                                               |               |                                             |                                                                                            |
| Dube 2014               | Lake Mutirikwi, Zimbabwe, South Africa            | 910                                   | Landsat                    | 1984, 1995, 2001, 2011 | 4            | Level 2 BOA (FLAASH)   |                                                                      | N/A                           | -                                        | NDVI                                                                                                          | 0-0.32        | -                                           | -                                                                                          |
| Robles et al 2015       | Lake Columbus, Mississippi, USA                   | 12.08                                 | Landsat-5                  | 2005, 2006             | 5            | N/A                    | -                                                                    | -                             | -                                        | NDVI                                                                                                          | 0.8 - 0.96    | Jul, Sep                                    | -                                                                                          |
|                         | Lake Aberdeen, Mississippi, USA                   | 9.67                                  |                            |                        |              |                        |                                                                      |                               |                                          |                                                                                                               |               |                                             |                                                                                            |
| Dube et al 2017         | Lake Chivero, Zimbabwe, Africa                    | 61                                    | Landsat- 7, 8              | 2015                   | 2            | Level 2 BOA (FLAASH)   | Discriminant analysis                                                | N/A                           | -                                        | -                                                                                                             | -             | -                                           | -                                                                                          |
| Dube et al 2017a        | Lake Manyame, Zimbabwe, Africa                    | 81                                    | Landsat- 8                 | N/A                    | N/A          | Level 2 BOA (FLAASH)   | (Partial Least Squares) - Discriminant Analysis                      | N/A                           | -                                        | -                                                                                                             | -             | -                                           | -                                                                                          |
|                         | Lake Chivero, Zimbabwe, Africa                    | 61                                    |                            |                        |              |                        | N/A                                                                  | N/A                           | -                                        | -                                                                                                             | -             | -                                           | -                                                                                          |
| Dube et al 2018         | Lake Chivero, Zimbabwe, Africa                    | 61                                    | Landsat 1- 8               | 1973 - 2014            | 7            | Level 2 BOA (FLAASH)   | Discriminant analysis                                                | 0-590                         | -                                        | -                                                                                                             | -             | -                                           | -                                                                                          |
| Ongore 2018             | Winam Gulf, Lake Victoria, Kenya, Oriental Africa | 1920                                  | Landsat-7                  | 2014                   | 9            | Level 1 TOA            | Jeffries Matusita distance spectral angle and Bray Curtis similarity | 6000                          | Sep                                      | NDVI                                                                                                          | N/A           | N/A                                         | -                                                                                          |
|                         |                                                   |                                       | Landsat-7, 8               | 2015                   | 12           |                        |                                                                      | 4000                          | Oct                                      |                                                                                                               |               |                                             |                                                                                            |
|                         |                                                   |                                       | Landsat-8                  | 2016                   | 12           |                        |                                                                      | 10000                         | Oct                                      |                                                                                                               |               |                                             |                                                                                            |
|                         |                                                   |                                       | Sentinel-2                 | 2017                   | 12           |                        |                                                                      | 10000                         | Jan                                      |                                                                                                               |               |                                             |                                                                                            |
| Thamaga & Dube 2018     | Greater Letaba river, South Africa                | N/A                                   | Landsat-8, Sentinel-2      | 2017                   | N/A          | Level 2 BOA (DOS)      | Discriminant Analysis, Maximum likelihood classifier                 | N/A                           | -                                        | NDVI, NDWI, EVI, SRI, SAVI, GI, GNDVI, Cigreen, ARVI, RVI, TVI, OSAVI, RDVI, VGI, NGI, and DVI (combined use) | N/A           | N/A                                         | -                                                                                          |
| Mukaronwiro et al 2019  | various water bodies, Rwanda, East African        | N/A                                   | Landsat-8                  | 2016                   | 3            | Level 2 BOA (FLAASH)   | Random Forest, Support Vector Machine                                | 3-40% depending on water body | -                                        | -                                                                                                             | -             | -                                           | -                                                                                          |
| Thamaga & Dube 2019     | Greater Letaba river, South Africa                | N/A                                   | Sentinel-2                 | 2017                   | 9            | Level 2 BOA (DOS)      | Linear Discriminant Analysis                                         | 28% (dry) -68% (wet)          | Oct                                      | NDVI, NDWI, EVI, SRI, SAVI, GI, GNDVI, Cigreen, ARVI, RVI, TVI, OSAVI, RDVI, VGI, NGI, DVI (combined use)     | N/A           | N/A                                         | -                                                                                          |
| Ghoussein et al 2019    | Al kabir river, Lebanon                           | 0.4                                   | Sentinel-2                 | 2015                   | 5            | Level 2 BOA (Sen2Cor)  | -                                                                    | 1.9                           | oct                                      | FVC                                                                                                           | N/A           | -                                           | -                                                                                          |
|                         |                                                   |                                       |                            | 2016                   | 18           |                        |                                                                      | 3.8                           | Sep                                      |                                                                                                               |               |                                             |                                                                                            |
|                         |                                                   |                                       |                            | 2017                   | 19           |                        |                                                                      | 3.8                           | oct                                      |                                                                                                               |               |                                             |                                                                                            |
|                         |                                                   |                                       |                            | 2018                   | 34           |                        |                                                                      | 10.5                          | aug                                      |                                                                                                               |               |                                             |                                                                                            |
| Asmare et al 2020       | North Eastern Lake Tana, Ethiopia                 | 3032                                  | Landsat 8 OLI              | 2013                   | 1            | Level 2 BOA            | Decision tree; maximum likelihood classifier                         | 112.1                         | -                                        | -                                                                                                             | -             | -                                           | -                                                                                          |
|                         |                                                   |                                       |                            | 2015                   | 1            |                        |                                                                      | 168.7                         |                                          |                                                                                                               |               |                                             |                                                                                            |
|                         |                                                   |                                       |                            | 2017                   | 1            |                        |                                                                      | 1512                          |                                          |                                                                                                               |               |                                             |                                                                                            |
|                         |                                                   |                                       |                            | 2015                   |              |                        |                                                                      | 278.3                         | feb                                      |                                                                                                               |               |                                             |                                                                                            |
| Dersseh et al 2020      | Lake Tana, Ethiopia                               | 3156                                  | Sentinel-2                 | 2016                   | N/A          | Level 1 TOA            | Random Forest                                                        | 613.6                         | oct                                      | NDVI                                                                                                          | 0.27-0.47     | N/A                                         | -                                                                                          |
|                         |                                                   |                                       |                            | 2017                   |              |                        |                                                                      | 1108.7                        | sep                                      |                                                                                                               |               |                                             |                                                                                            |
|                         |                                                   |                                       |                            | 2018                   |              |                        |                                                                      | 2036.5                        | dec                                      |                                                                                                               |               |                                             |                                                                                            |
|                         |                                                   |                                       |                            | 2019                   |              |                        |                                                                      | 2504.5                        | dec                                      |                                                                                                               |               |                                             |                                                                                            |
|                         |                                                   |                                       |                            |                        |              |                        |                                                                      |                               |                                          |                                                                                                               |               |                                             |                                                                                            |
| Worqlul et al 2020      | North Eastern Lake Tana, Ethiopia                 | N/A                                   | PlanetScope MODIS (WQdata) | 2017 - 2018            | 12           | N/A                    | Maximum likelihood classifier                                        | 300-1600                      | Apr                                      | -                                                                                                             | -             | -                                           | Remotely sensed Water temperature, turbidity, lake level                                   |
| Singh et al 2020        | 98 water bodies, South Africa                     | 15573                                 | Landsat-8, Sentinel-2      | 2013, from 2015-2019   | 275          | Level 1 TOA            | Random Forest                                                        | 41800 (2013)                  | N/A                                      | MNDWI, NDVI, LSWI, GARI, NDAVI (combined use)                                                                 | N/A           | N/A                                         | -                                                                                          |
| Baretheur 2020          | Bellandur Lake, India                             | 1.25                                  | Sentinel-2, WorldView 02   | 2002 - 2019            | 31           | Level 1 TOA            | maximum likelihood classifier                                        | N/A                           | N/A                                      | -                                                                                                             | -             | -                                           | -                                                                                          |
|                         | Varthur, India                                    | 1                                     |                            |                        |              |                        |                                                                      | N/A                           | N/A                                      |                                                                                                               |               |                                             |                                                                                            |
| Al-lami et al 2021      | Tigris River, Iraq                                | N/A                                   | Landsat 8 OLI              | 2016                   | 1            | N/A                    | -                                                                    | N/A                           | N/A                                      | CI Green, EVI, NDVI, MSAVI2, SAVI, DVI, ARVI, MSI (in order of accuracy)                                      | 0.39-0.47     | N/A                                         | N/A                                                                                        |
| Mukaronwiro et al 2021  | Rwanda, East African                              | N/A                                   | Landsat                    | 1989                   | N/A          | Level 2 BOA (FLAASH)   | Random Forest                                                        | 50000                         | N/A                                      | -                                                                                                             | -             | -                                           | -                                                                                          |
|                         |                                                   |                                       |                            | 2002                   |              |                        |                                                                      | 83000                         |                                          |                                                                                                               |               |                                             |                                                                                            |
|                         |                                                   |                                       |                            | 2017                   |              |                        |                                                                      | 49000                         |                                          |                                                                                                               |               |                                             |                                                                                            |
| Djihouessi 2021         | Lake Nokoué, Benin, Africa                        | 150                                   | Sentinel-2                 | 2016 - 2017            | N/A          | N/A                    | -                                                                    | 25-976                        | Dec                                      | NDVI                                                                                                          | 0.3-0.9       | Dec                                         | Filed data temperature, pH, salinity, dissolved oxygen, transparency, nutrients, and Chl-a |
| Kleinschroth et al 2021 | 20 reservoirs around the world                    | 149 - 152800                          | Landsat                    | 1984-2018              | N/A          | N/A                    | -                                                                    | 18-514                        | N/A                                      | NDVI                                                                                                          | >0.3          | N/A                                         | -                                                                                          |
| This study              | North Eastern Lake Tana, Ethiopia                 | N/A                                   | Sentinel-2                 | 2020                   | 12           | Level 2 BOA (Sen2Cor)  | -                                                                    | < 18                          | Jan, Nov                                 | NDVI                                                                                                          | 0.6-0.95      | Oct                                         | Remote sensng: TSM, Chl-a; Field data: Air Temperature                                     |
